# Supplementary material for: Puree and Juice of Thai Mango and Pineapple Analyzed by High-Performance Thin-Layer Chromatography Hyphenated with Effect-Directed Assays
Source: MDPI journal article supplement (doi:10.3390/molecules26247683), 2021-12-19
Supplement: s1 [file s1]

## Supplementary Materials

Puree and juice of Thai mango and pineapple analyzed by  
high-performance thin-layer chromatography hyphenated with  
effect-directed assays

*G.E. Morlock,<sup>a\*,†</sup> N. Wutthinithisanand<sup>a,b,†</sup>, D. Rauhut<sup>b</sup>*

<sup>a</sup>Chair of Food Science, Institute of Nutritional Science, and Interdisciplinary  
Research Center, Justus Liebig University Giessen, Heinrich-Buff-Ring 26-  
32, 35392 Giessen, Germany

<sup>b</sup>Department of Microbiology and Biochemistry, Hochschule Geisenheim  
University, Von-Lade-Str. 1, 65366 Geisenheim, Germany

<sup>†</sup>Both authors contributed equally.

\*Corresponding author. Tel. +49-641-99-39141. Fax +49-641-99-39149. E-  
mail address: Gertrud.Morlock@uni-giessen.de (G.E. Morlock).

**Table S1.** Investigated mobile phases 1–6, which led to successful separations in previous projects: methanolic extracts (10  $\mu$ L; 0.4 g/mL or 4 mg/area) applied as 6 (or 7) x 3 mm area, developed on HPTLC silica gel 60 F<sub>254</sub> plates with mobile phases as listed up to 60 mm, derivatized with anisaldehyde sulfuric acid reagent and documented at FLD 366 nm.

|                                                                                                                                                                                                                                |                                                                                                                                                                                                                |                                                                                                                                                                                 |                                                                                                                                                                                                                       |
|--------------------------------------------------------------------------------------------------------------------------------------------------------------------------------------------------------------------------------|----------------------------------------------------------------------------------------------------------------------------------------------------------------------------------------------------------------|---------------------------------------------------------------------------------------------------------------------------------------------------------------------------------|-----------------------------------------------------------------------------------------------------------------------------------------------------------------------------------------------------------------------|
| <p><b>1</b></p> 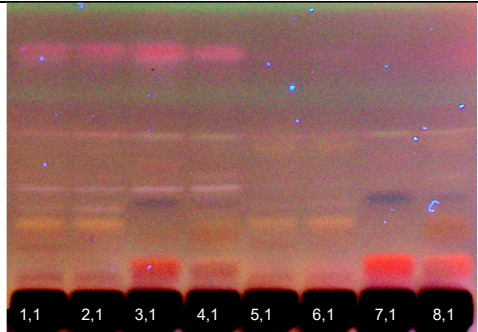 <p>1,1 2,1 3,1 4,1 5,1 6,1 7,1 8,1</p> <p>Toluene – ethyl acetate – methanol – formic acid<br/>2.4:1.8:0.7:0.06, V/V/V/V</p> | <p><b>2</b></p>  <p>1,1 2,1 3,1 4,1 5,1 6,1 7,1 8,1</p> <p>Toluene – ethyl acetate – formic acid<br/>7:3:0.1, V/V/V</p>      |                                                                                                                                                                                 |                                                                                                                                                                                                                       |
| <p><b>3</b></p>  <p>1 2,1 3,1 4,1</p> <p>Ethyl acetate – toluene – formic acid – H<sub>2</sub>O<br/>8:2:1.5:1, V/V/V/V</p>                  | <p><b>4</b></p>  <p>1 2,1 3,1 4,1</p> <p>Ethyl acetate – 2-butanone – formic acid – H<sub>2</sub>O<br/>5:3:2:1, V/V/V/V</p> | <p><b>5</b></p>  <p>1,1 2,1 3,1 4,1</p> <p><i>n</i>-Hexane – ethyl acetate 6.5:3.5, V/V</p> | <p><b>6</b></p>  <p>1,1 2,1 3,1</p> <p>Acetonitrile – H<sub>2</sub>O 4:1, V/V, + 8 mg diphenylboric acid - 2-aminoethylester</p> |

**Table S2.** Chromatograms at UV 254 nm and FLD 366 nm before the respective assay detection as in Fig. 4.

| UV 254 nm                                                                           | FLD 366 nm                                                                           |
|-------------------------------------------------------------------------------------|--------------------------------------------------------------------------------------|
| Before the DPPH• assay                                                              |                                                                                      |
| 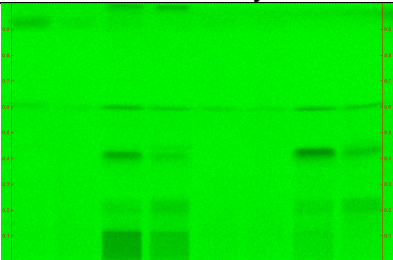   |    |
| Before the <i>A. fischeri</i> bioassay                                              |                                                                                      |
|    |    |
| Before the <i>B. subtilis</i> bioassay                                              |                                                                                      |
| No F <sub>254</sub> plate                                                           |  |
| Before the AChE assay                                                               |                                                                                      |
|  |  |
| Before the tyrosinase assay                                                         |                                                                                      |
|  |  |
